# Supplementary material for: Nephroprotective Role of Chrysophanol in Hypoxia/Reoxygenation-Induced Renal Cell Damage via Apoptosis, ER Stress, and Ferroptosis
Source: MDPI journal article supplement (doi:10.3390/biomedicines9091283), 2021-09-21
Supplement: s1 [file s1]

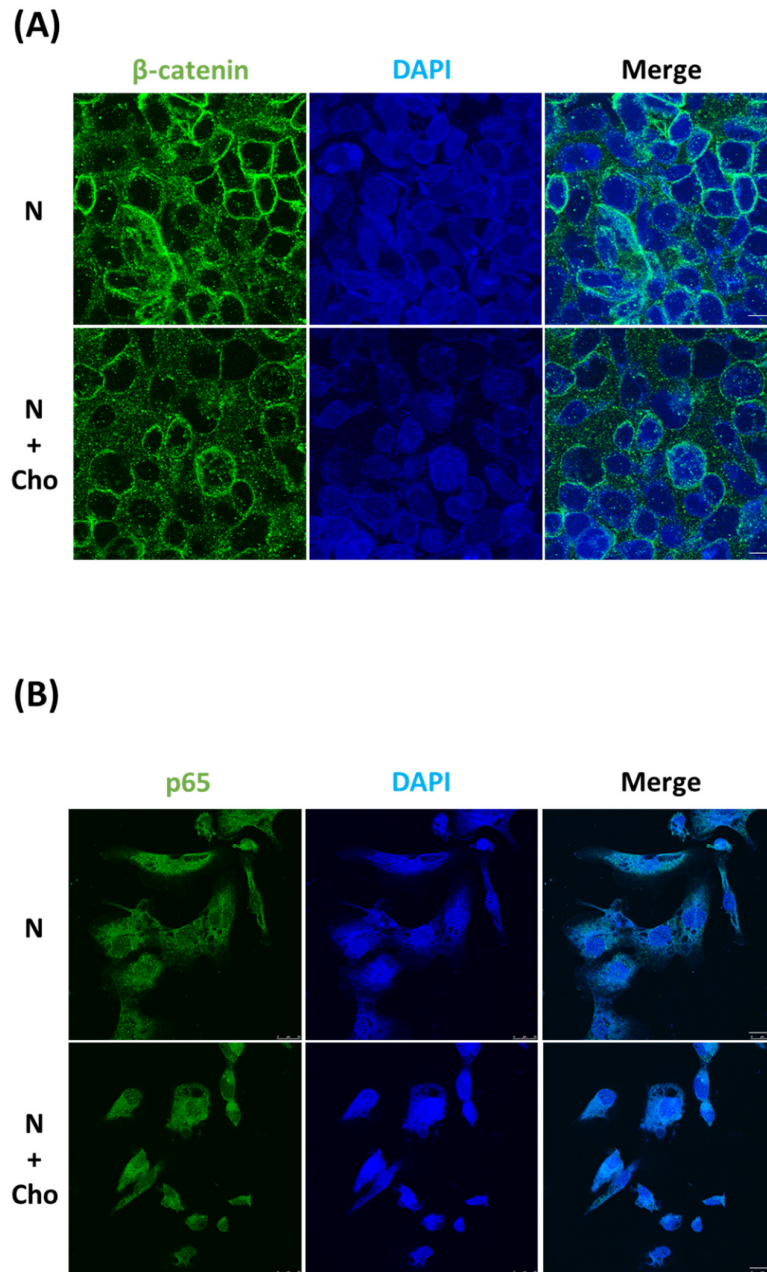

**Figure S1.** Effect of chrysophanol on nuclear translocation of  $\beta$ -catenin and p65 under normoxia. Immunofluorescence micrographs showed the distribution of  $\beta$ -catenin (A) and p65 (B). The  $\beta$ -catenin (A) and p65 (B) signal was intensely localized to the cytoplasm both in HK-2 cells under normoxia condition (N) and normoxia conditions in the presence of 30  $\mu$ M chrysophanol (N+ Cho). The nuclei were counterstained with DAPI. Bar = 25  $\mu$ m.
